# Supplementary material
Source: PubMed Central journal article supplement (PMC9905265)
Supplement: NIHMS1846102-supplement-5.pdf [file NIHMS1846102-supplement-5.pdf]

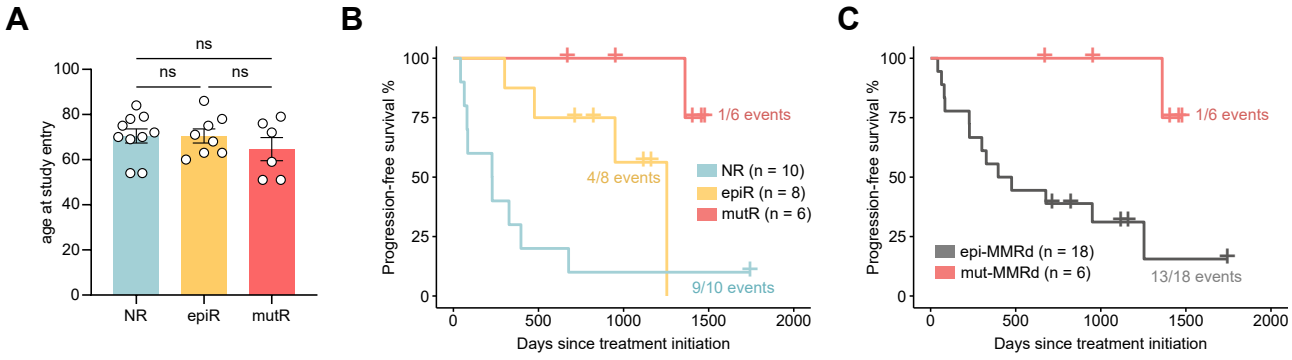

**Supplementary Figure S1: Additional characterization of the clinical trial cohort**

**A.** Bar plot detailing the age of trial participants at the time of study entry, across NR, epiR, and mutR groups. Statistical significance was assessed by one-way ANOVA with Tukey's multiple comparisons test.

**B-C.** Kaplan-Meier progression-free survival curves, separated by NR, epiR, and mutR classifications (**B**), or by the mechanism of MMRd (**C**), calculated relative to the timepoint of pembrolizumab initiation in each patient. The proportion of patients that showed progression of disease is also annotated.

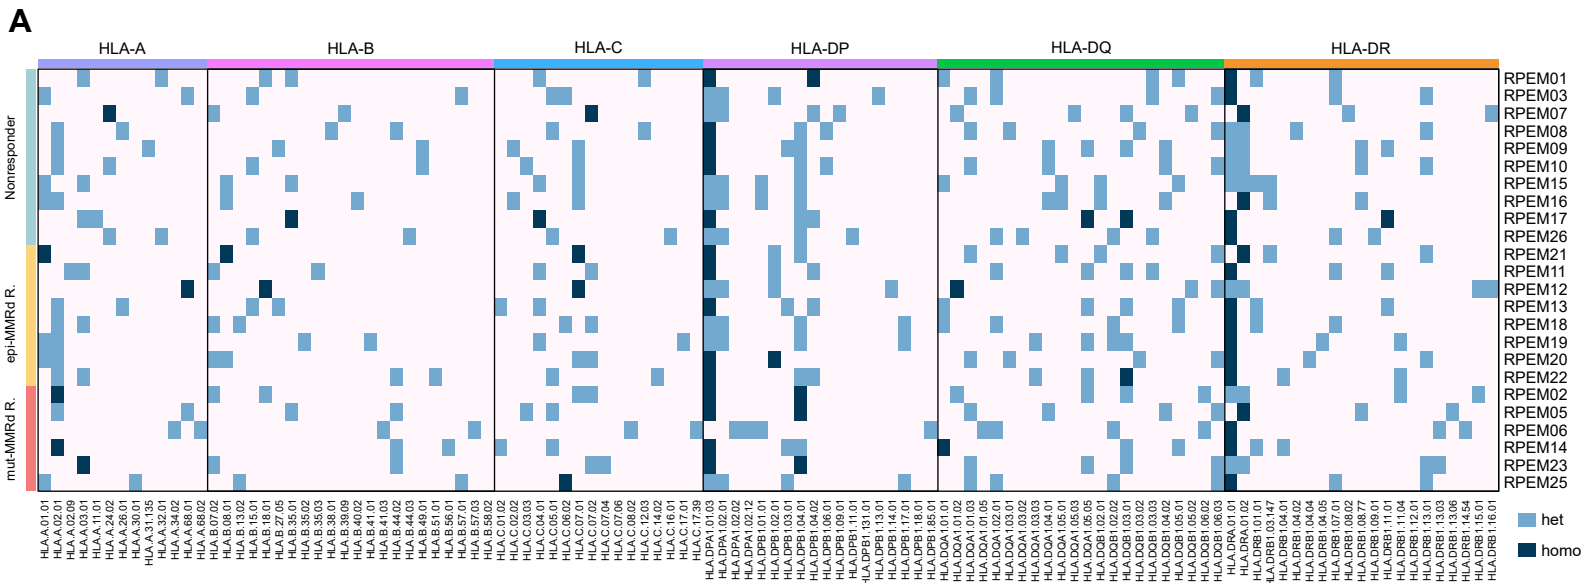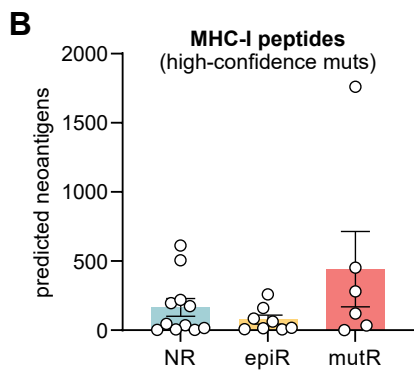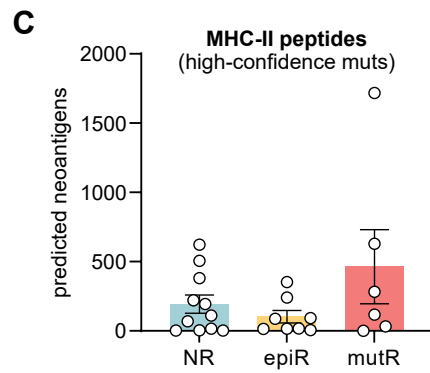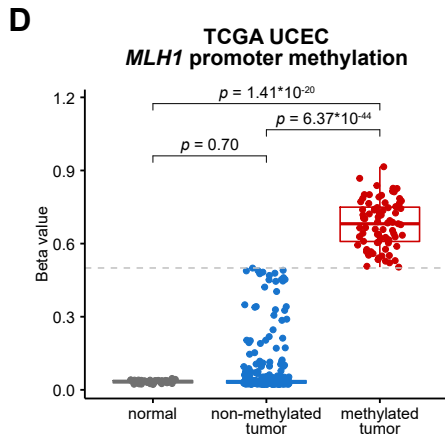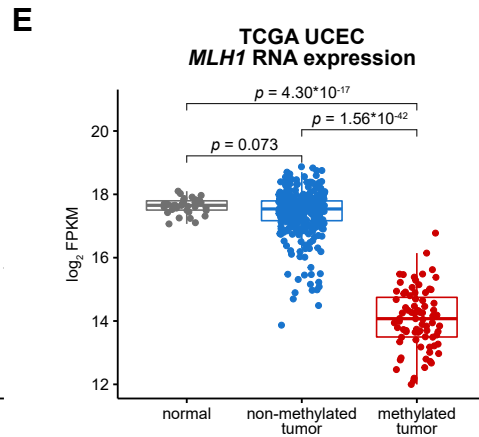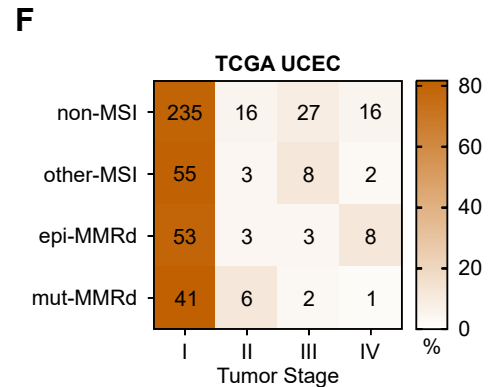

**Supplementary Figure S2: Additional characterization of exome profiles and defining *MLH1* methylation status**

**A.** HLA genotypes in each sample, defined for HLA-A, HLA-B, HLA-C, HLA-DP, HLA-DQ, and HLA-DR. Light blue cells indicate heterozygosity, while dark blue cells denote homozygosity.

**B-C.** Number of predicted neoantigens for MHC-I (**B**) or MHC-II (**C**) in each pre-treatment sample, based on the exome profiles.

**D.** Tukey boxplots of composite methylation beta values for probes tiling the *MLH1* promoter. Data are from the TCGA UCEC cohort. A beta value threshold of 0.5 was used to define non-methylated and methylated tumors. Statistical significance was assessed by two-tailed unpaired Mann-Whitney test.

**E.** Expression of *MLH1* in the TCGA UCEC cohort, stratified by *MLH1* promoter methylation status, as in (**D**). Statistical significance was assessed by two-tailed unpaired Mann-Whitney test.

**F.** Heatmap of tumor stage annotations across groups. Cells are colored by the percentage of patients within each patient category, with the number of patients indicated in each cell.

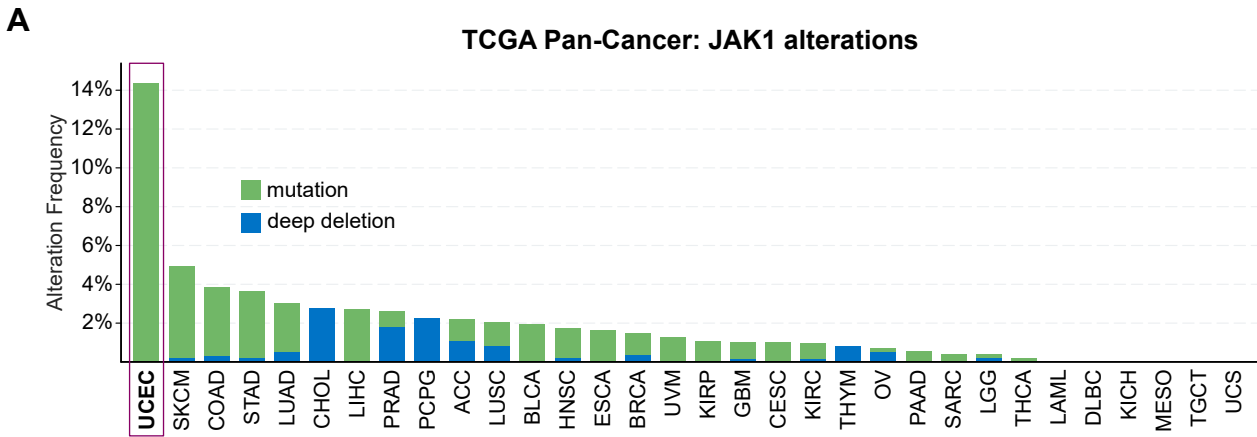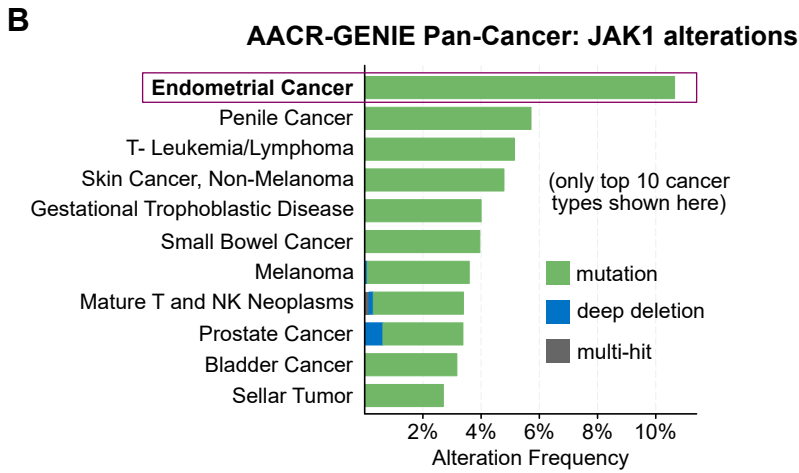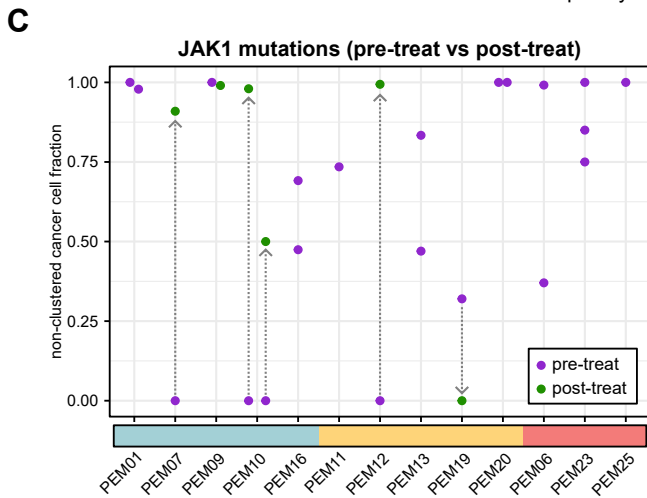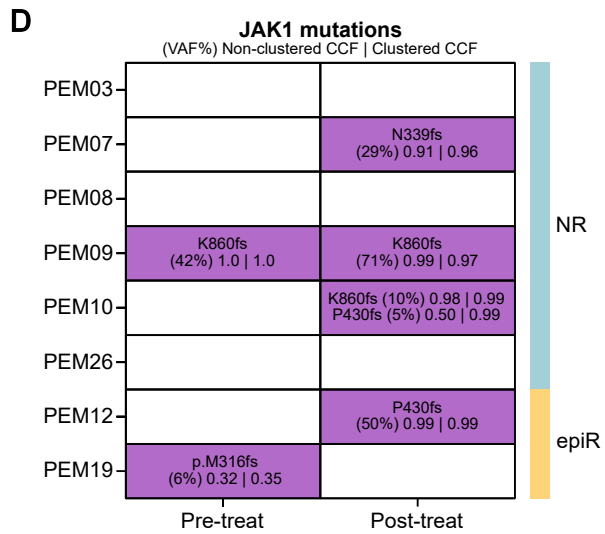

**Supplementary Figure S3: JAK1 alterations are most frequent in endometrial cancer**

**A.** Alteration frequency of *JAK1* across the TCGA Pan-Cancer Atlas.

**B.** Alteration frequency of *JAK1* across the AACR-GENIE cohort.

**C.** *JAK1*-mutant cancer cell fractions (CCFs) in *JAK1*-mutant tumors, without clustering. Each point represents a unique *JAK1* variant that was identified in a particular sample. Pre-treatment CCFs are annotated in purple, while post-treatment CCFs are in green, with arrows that connect the same variant across timepoints.

**D.** *JAK1* mutations in 8 patients from the trial cohort with matched pre-treatment and post-treatment tumor exomes. Samples with a *JAK1* mutation are shaded purple, with the specific mutation annotated. Variant allele frequencies (VAFs) are shown, along with estimated cancer cell fractions (CCFs; non-clustered and clustered).

**A**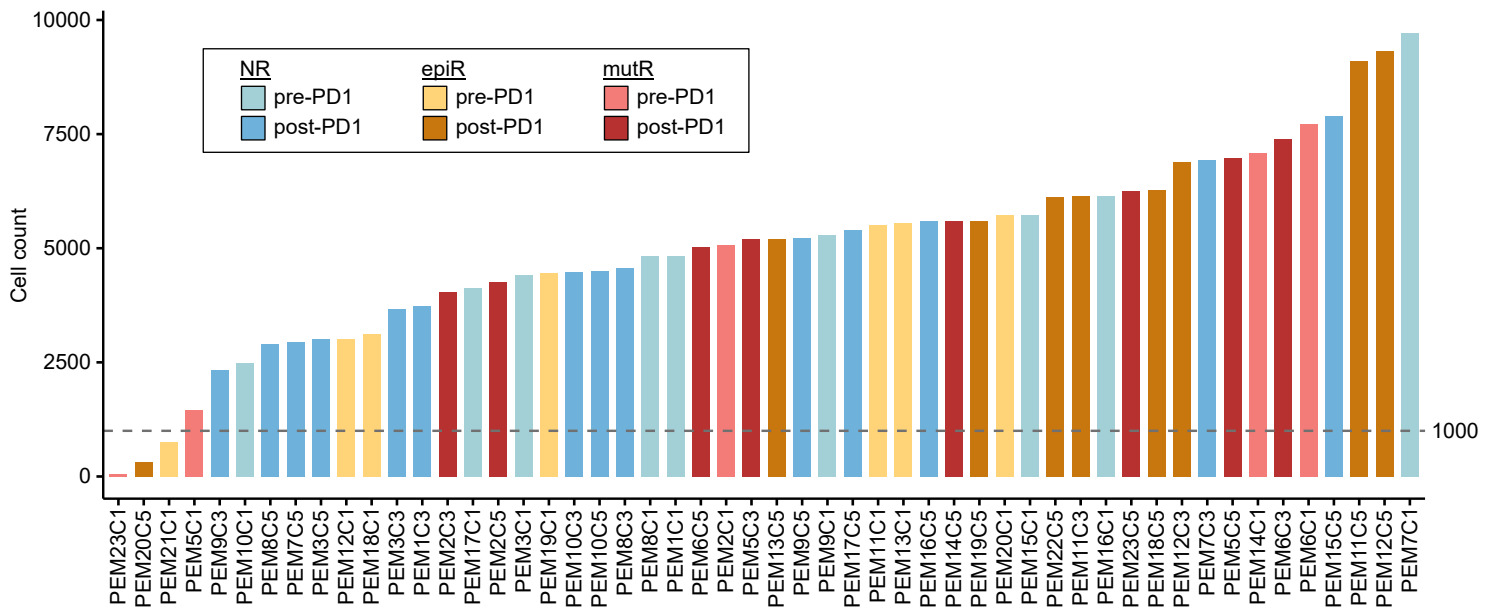**Supplementary Figure S4: Final cell counts in each scRNA-seq sample**

**A.** Bar plot showing the number of cells passing filtering criteria for each sample in the scRNA-seq dataset. After quality control and cell filtering, samples with fewer than 1000 cells were removed from further analysis.

**A**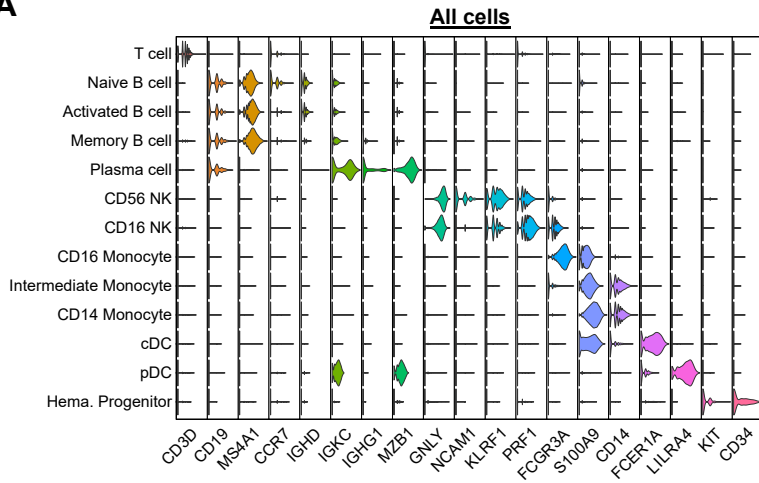**B**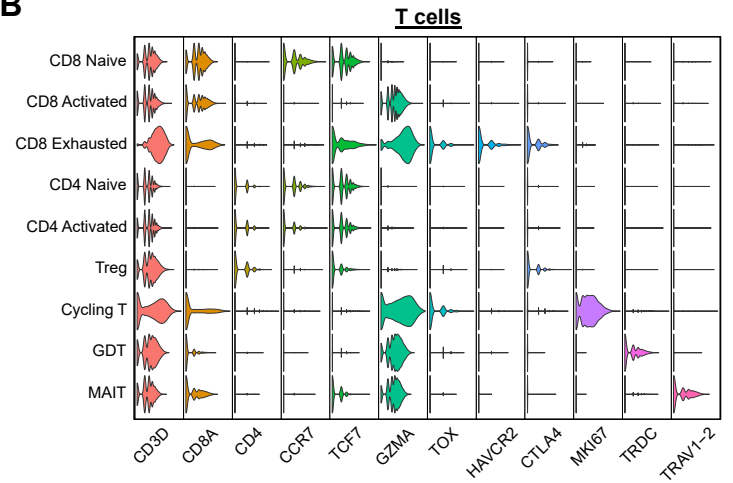**C**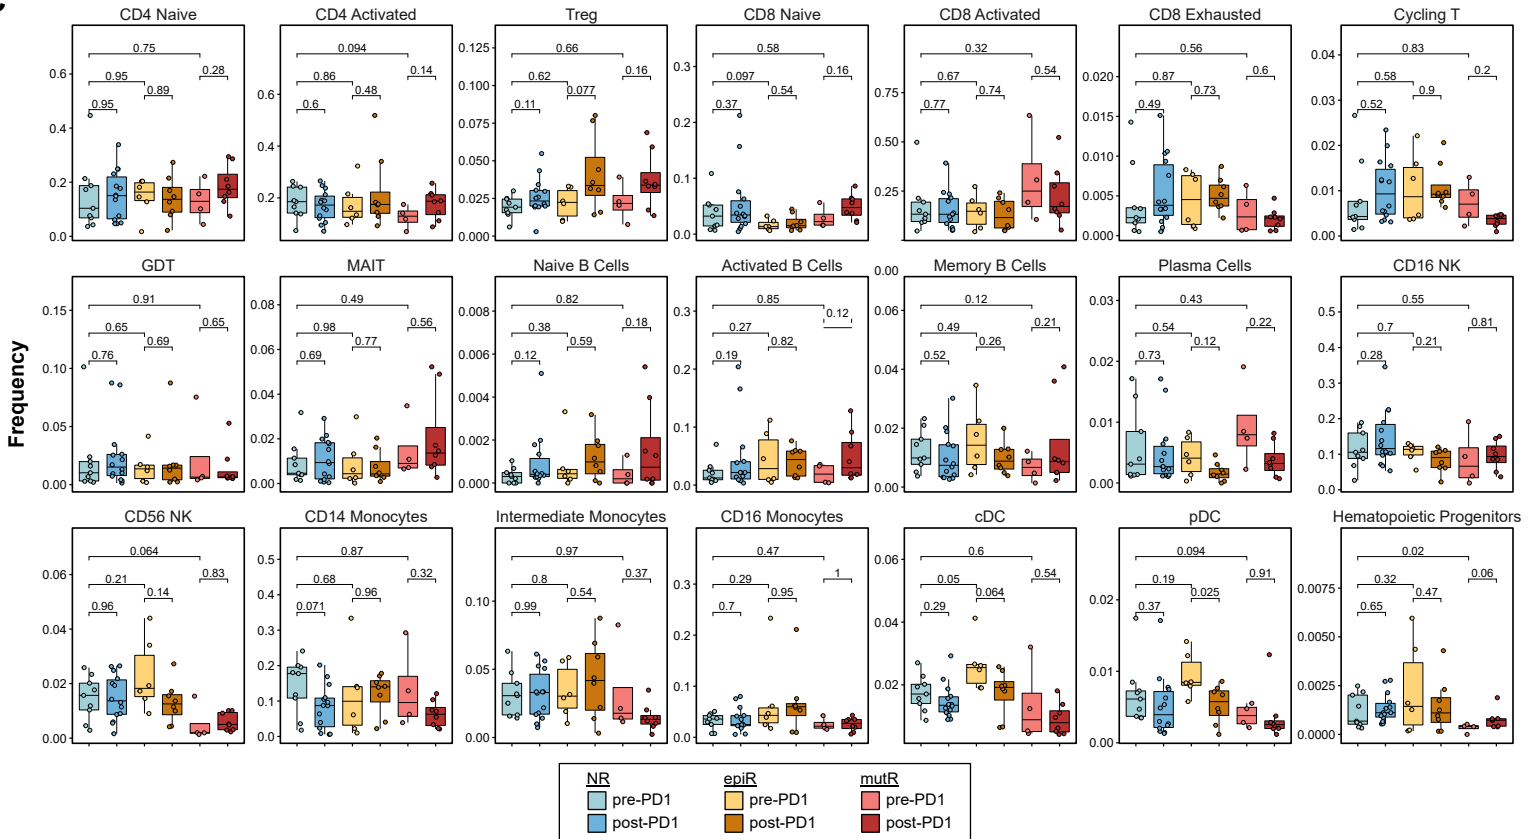

### Supplementary Figure S5: Longitudinal transcriptional profiling of circulating immune cells before and after PD-1 blockade

**A.** Violin plots detailing key marker genes for each of the cell types identified in **Figure 3A**.

**B.** Violin plots detailing key marker genes for each of the T cell subsets identified in **Figure 3B**.

**C.** Tukey boxplots of total frequencies for each of the 21 cell types. Each point represents one sample, either before or after PD-1 immunotherapy. Statistical significance was assessed by two-tailed unpaired t-test.

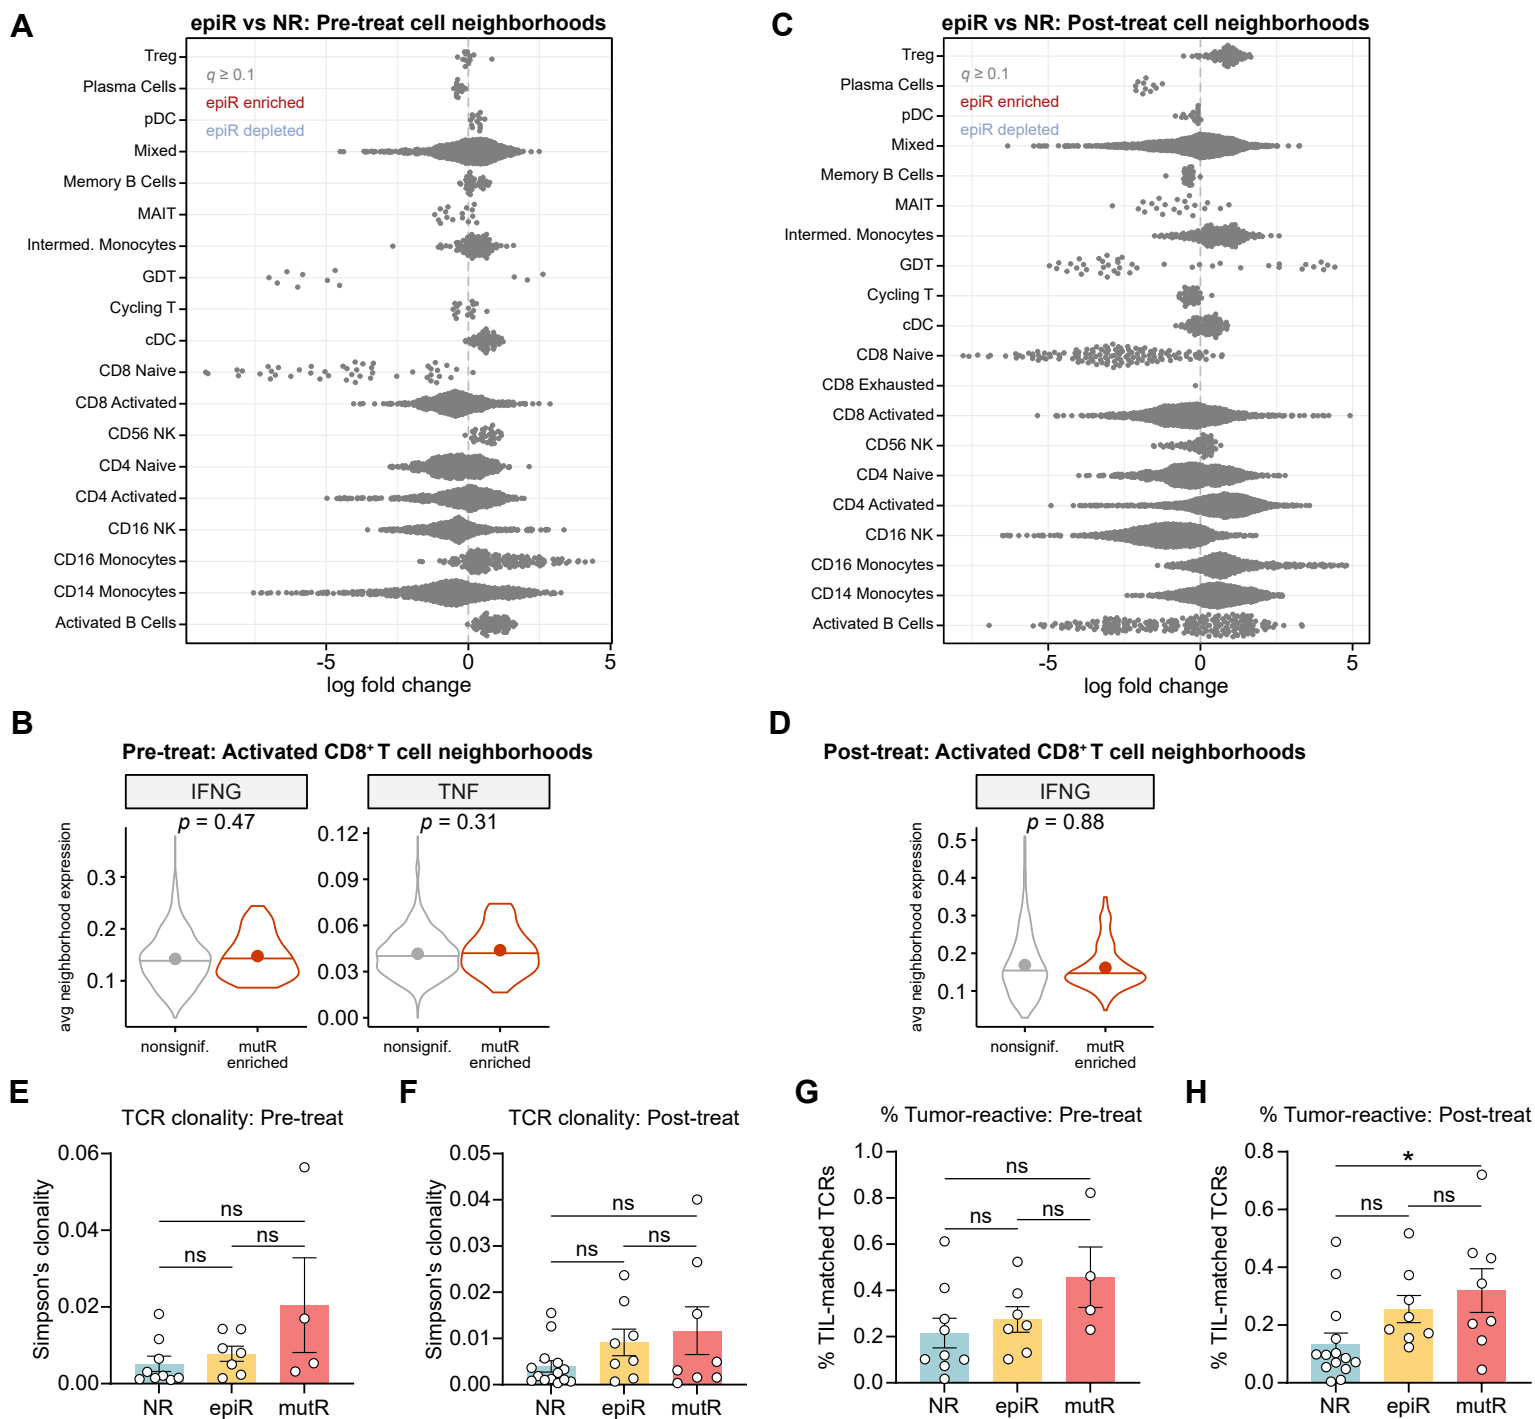

### Supplementary Figure S6: Differential abundance of cell neighborhoods after PD-1 immunotherapy

**A.** Milo differential abundance analysis for in epiR vs NR patients, before PD-1 immunotherapy.

**B.** Violin plots of *IFNG* and *TNF* expression in activated CD8<sup>+</sup> T cell neighborhoods that are enriched in mutR vs NR patients, before PD-1 immunotherapy. Horizontal lines indicate the median, while points indicate the mean.

**C.** Milo differential abundance analysis in epiR vs NR patients, after PD-1 immunotherapy.

**D.** Violin plots of *IFNG* expression in activated CD8<sup>+</sup> T cell neighborhoods that are enriched in mutR vs NR patients, after PD-1 immunotherapy. Horizontal lines indicate the median, while points indicate the mean.

**E-F.** Simpson's clonality indices of peripheral TCR repertoires before (**E**) or after (**F**) PD-1 immunotherapy.

**G-H.** The percentage of peripheral TCR sequences matched to pre-treatment tumor-infiltrating TCR repertoires, before (**G**) or after (**H**) PD-1 immunotherapy.

In (**A**) and (**C**), statistical significance was determined through a generalized linear model with Benjamini-Hochberg multiple hypothesis correction, as implemented in Milo. In (**B**) and (**D**), statistical significance was assessed by two-sided Mann-Whitney test, with Benjamini-Hochberg multiple hypothesis correction. In **E-H**, statistical significance was assessed by one-way ANOVA with Tukey's multiple comparisons test.

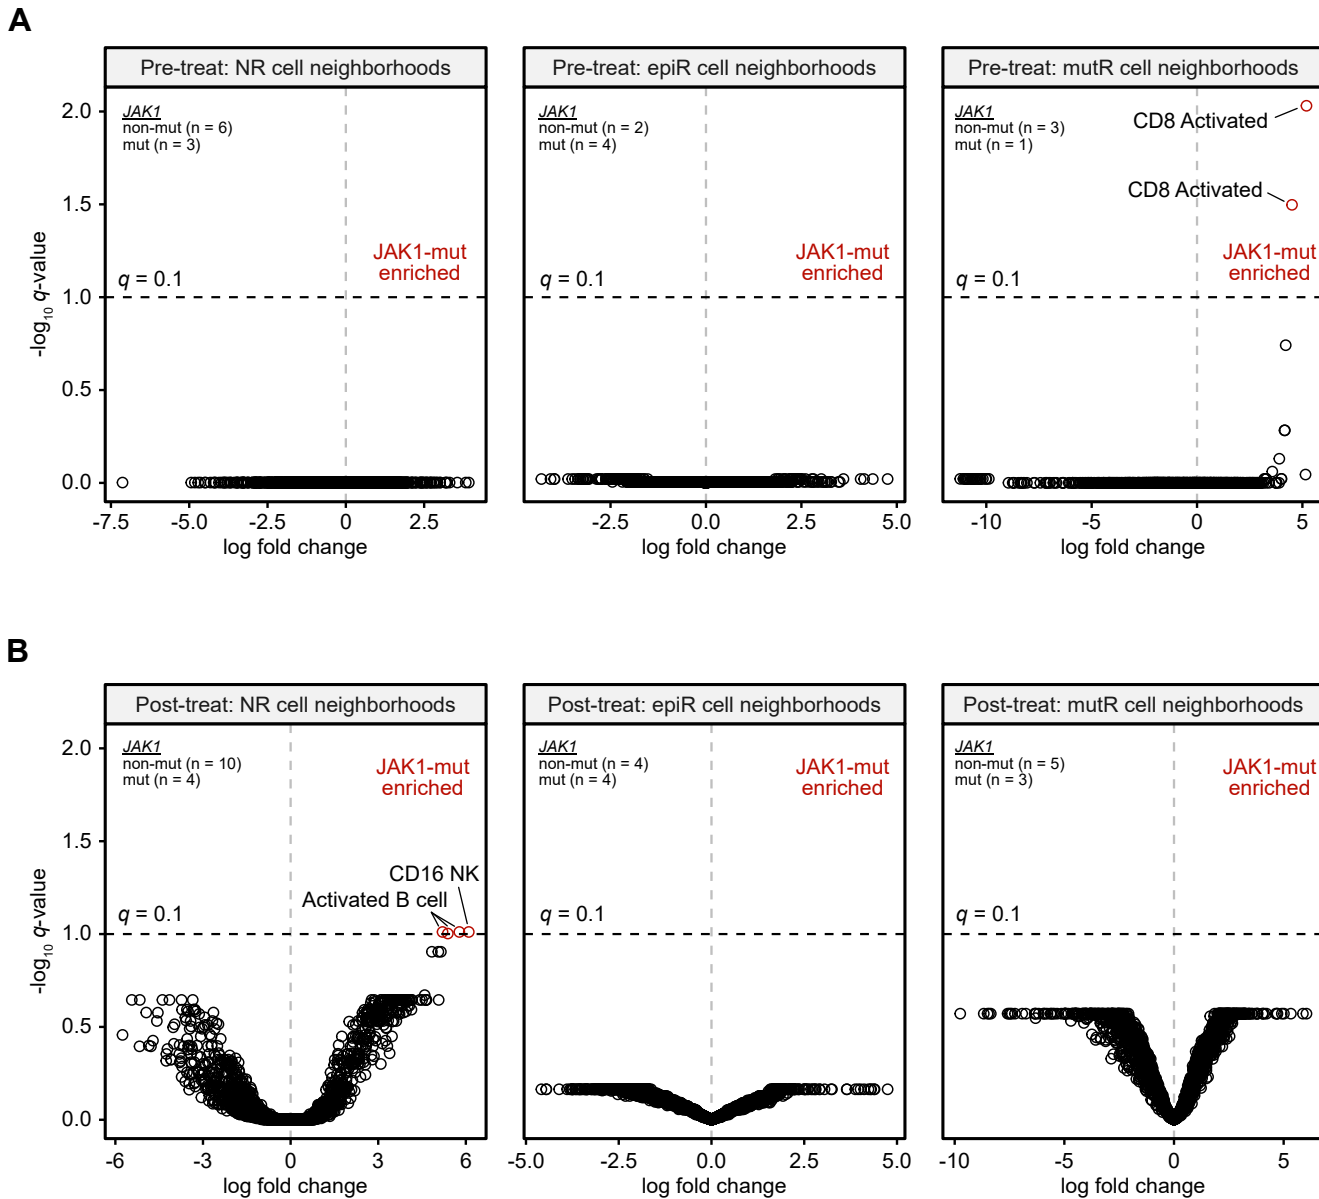

**Supplementary Figure S7: Differential abundance of cell neighborhoods in *JAK1*-mutant tumors**

**A-B.** Differential abundance analysis of cell neighborhoods in *JAK1*-mutant vs non-mutant tumors, before (A) or after (B) PD-1 immunotherapy. Cell neighborhoods were identified by kNN clustering, with each point representing one neighborhood. Neighborhoods in black were not significantly different compared to NR patients ( $q \geq 0.1$ ); neighborhoods in red were enriched in *JAK1*-mutant samples. Statistical significance was determined through a generalized linear model, as implemented in Milo.

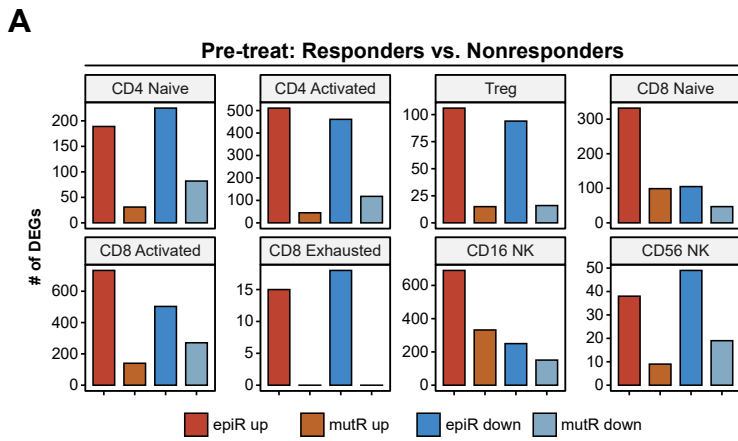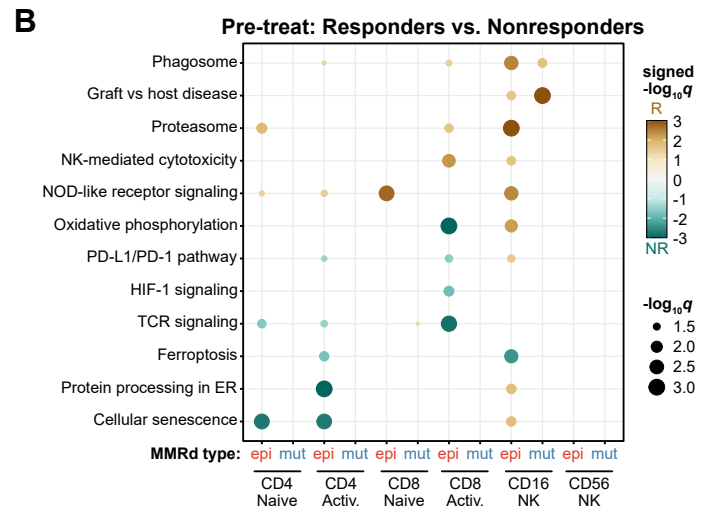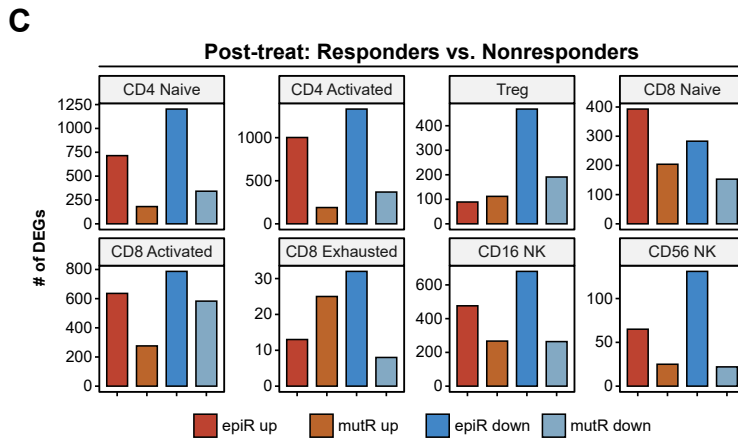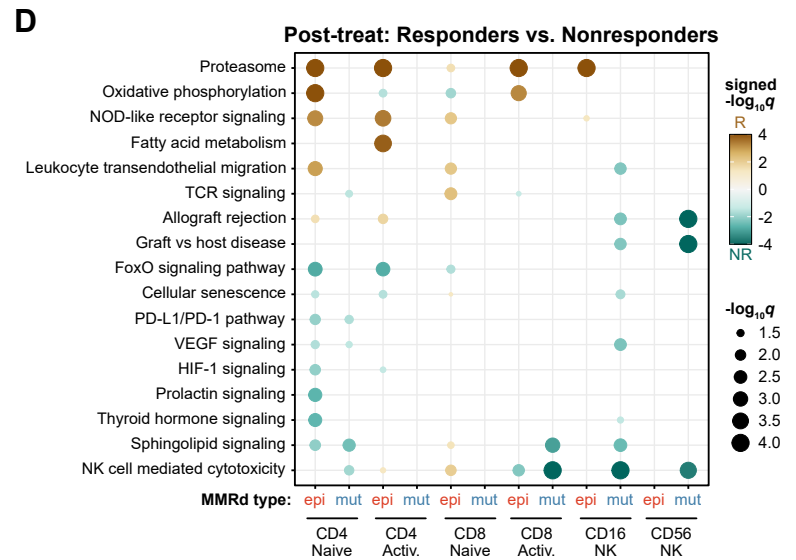

**Supplementary Figure S8: Transcriptional profiles of T and NK cells in responders vs non-responders**

**A.** The number of DEGs in T and NK cell populations from epiR or mutR patients compared to NR patients, before PD-1 immunotherapy.

**B.** Dot plots detailing significantly upregulated or downregulated pathways in each of the cell types, comparing epiR or mutR patients to NR patients, before PD-1 immunotherapy. Statistical significance was assessed by hypergeometric test with Benjamini-Hochberg multiple hypothesis correction, visualized as signed  $-\log_{10} q$ -values.

**C.** The number of DEGs in T and NK cell populations from epiR or mutR patients compared to NR patients, after PD-1 immunotherapy.

**D.** Dot plots detailing significantly upregulated or downregulated pathways in each of the cell types, comparing epiR or mutR patients to NR patients, after PD-1 immunotherapy. Statistical significance was assessed by hypergeometric test with Benjamini-Hochberg multiple hypothesis correction, visualized as signed  $-\log_{10} q$ -values.



**A**

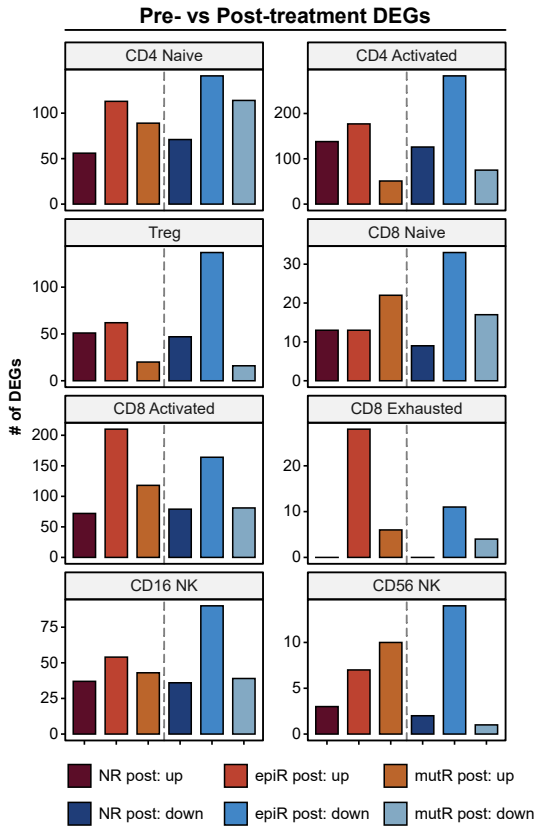

**B**

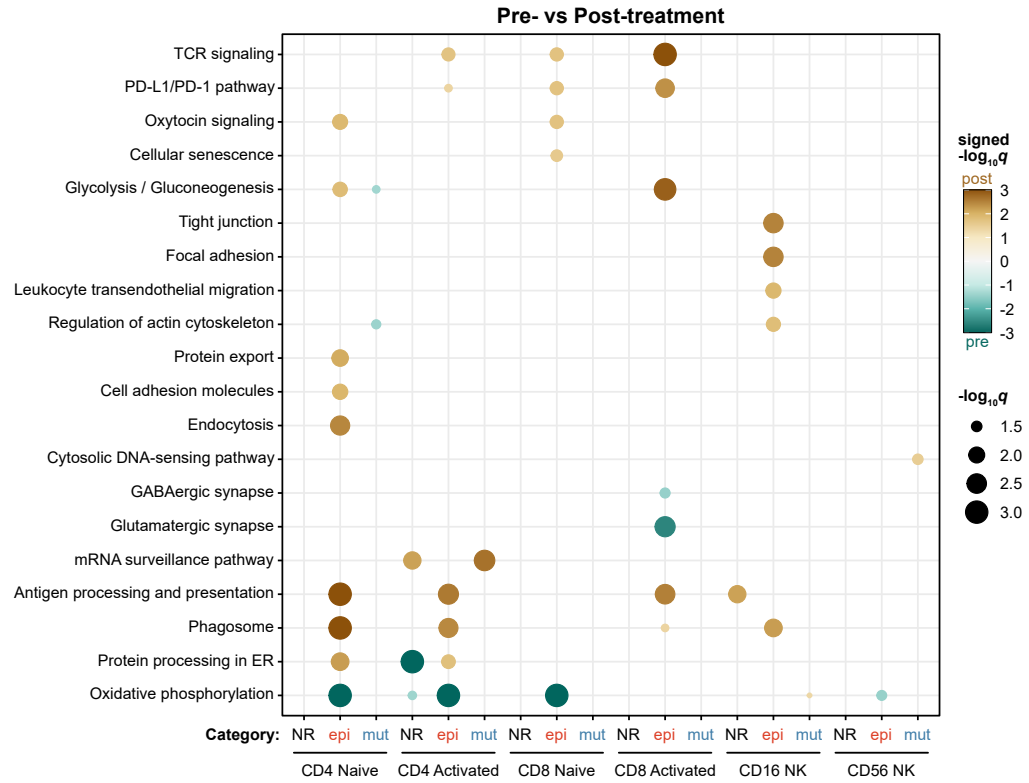

**Supplementary Figure S9: Gene expression changes in T and NK cells following PD-1 immunotherapy**

**A.** The number of DEGs in T and NK cell populations from NR, epiR, or mutR patients, comparing cells before and after PD-1 immunotherapy within each patient group.

**B.** Dot plot detailing significantly upregulated or downregulated pathways in each of the cell types, comparing cells from before and after PD-1 immunotherapy within each patient group. Statistical significance was assessed by hypergeometric test with Benjamini-Hochberg multiple hypothesis correction, visualized as signed  $-\log_{10} q$ -values.

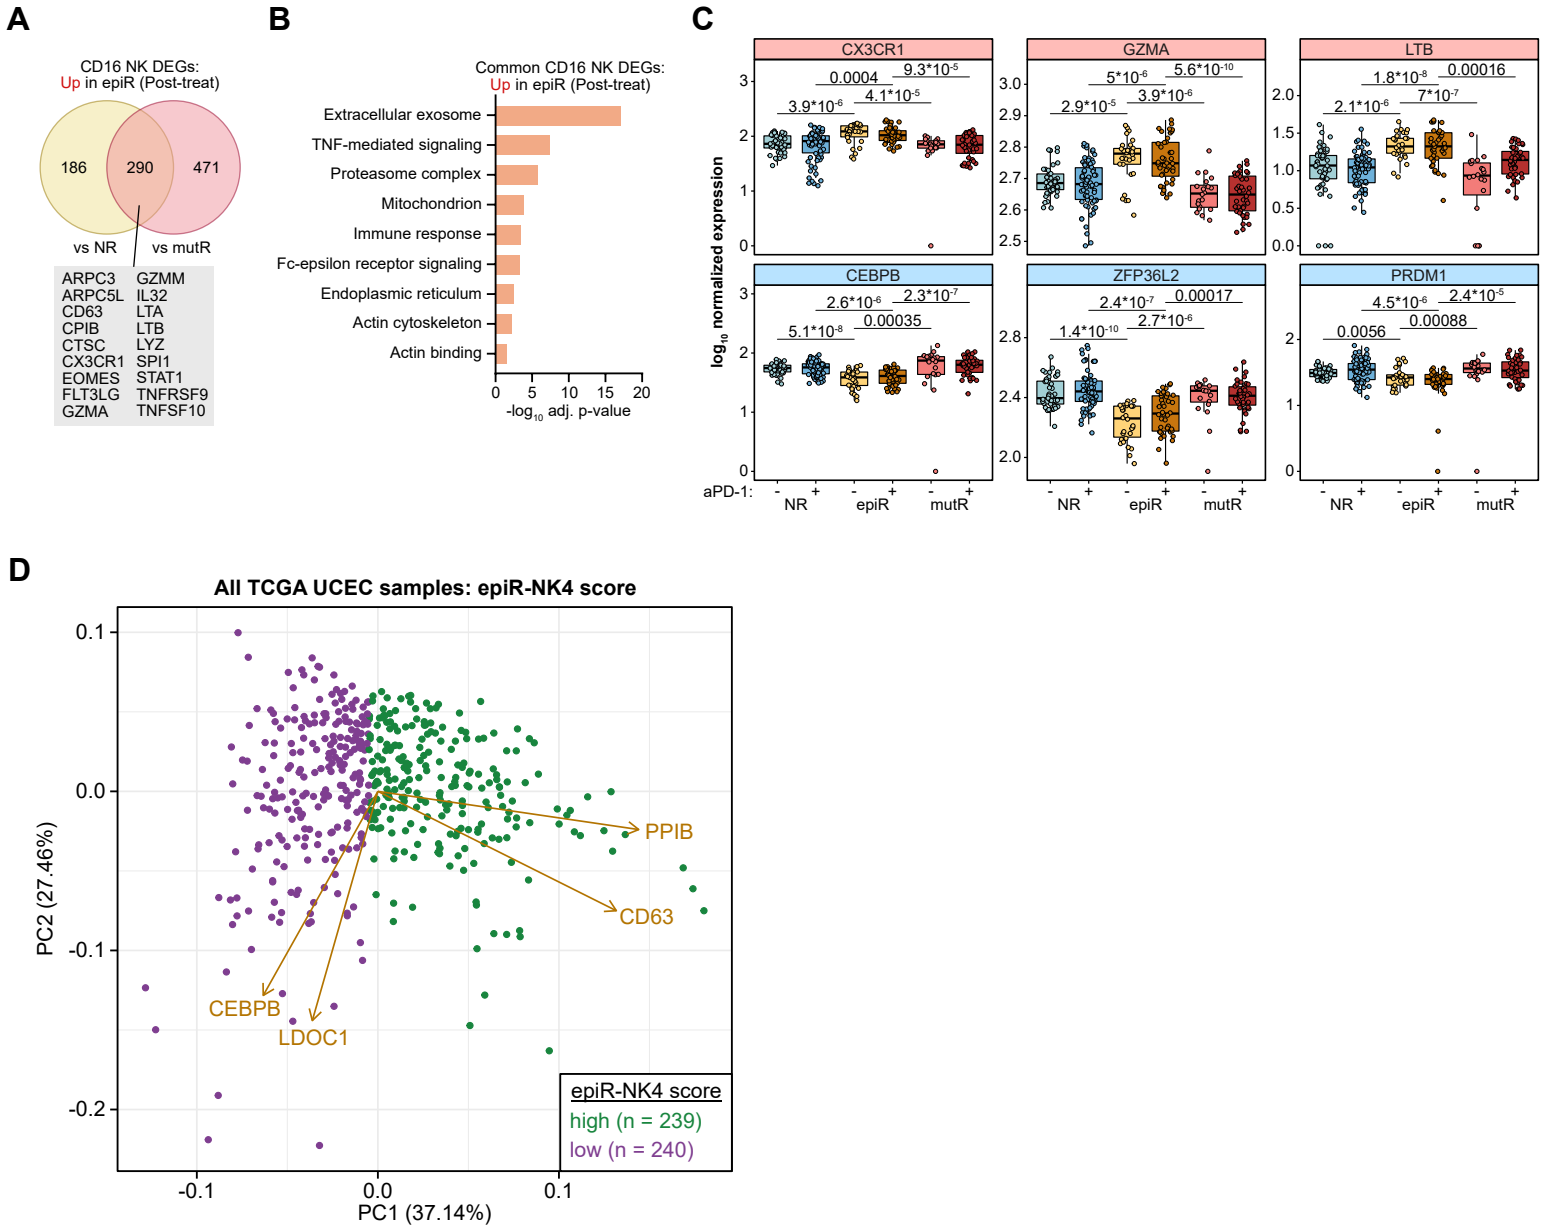

**Supplementary Figure S10: Additional transcriptional characterization of CD16<sup>+</sup> NK cells in epiR patients**

**A.** Venn diagram of DEGs in CD16<sup>+</sup> NK cells that are significantly upregulated in epiR patients compared to NR or mutR patients, after PD-1 immunotherapy.

**B.** Ontology enrichment analysis of DEGs in CD16<sup>+</sup> NK cells that are significantly upregulated in epiR patients compared to NR or mutR patients, after PD-1 immunotherapy. Statistical significance was assessed by hypergeometric test with Benjamini-Hochberg multiple hypothesis correction.

**C.** Tukey boxplots of normalized gene expression values for select DEGs in epiR CD16<sup>+</sup> NK cells.

**D.** Biplot of the principal component analysis used to construct the epiR-NK4 score from the TCGA UCEC cohort.
